# Supplementary material for: HHU24SWDSCS: A shallow-water depth model over island areas in South China Sea retrieved from Satellite-derived bathymetry
Source: Copernicus journal article supplement (doi:10.5194/essd-2024-443), 2024-10-23
Supplement: Supplementary file [file essd-2024-443-AC2-supplement.pdf]

This manuscript integrated ICESat-2 data and multispectral imagery from Sentinel-2 to construct a high-resolution, high-accuracy shallow water depth model namely HHU24SWDSCS. In geopolitically sensitive areas, such as the South China Sea, where the seafloor topography is complex, existing water depth data primarily rely on sparse multibeam sounding technology and satellite altimetry-derived depths. The HHU24SWDSCS model developed in this study successfully filled the gap in shallow water areas and offered an alternative that can be applied to similar regions globally. The comparisons with existing bathymetry models demonstrate that the computed model offers significant advantages in both accuracy and details for shallow areas, highlighting its potential for high-quality shallow water depth measurement. The manuscript demonstrates notable innovation and scientific significance. Publication is recommended following revisions.

Q1: The English writing should be further polished.

Response: The authors thank the reviewer for these beneficial comments. The authors have thoroughly reviewed the entire manuscript and made revisions to address grammatical errors and improve language expressions, resulting in more accurate and fluent expressions. The authors believe these improvements have significantly enhanced the readability and clarity of the work. Please refer to the revised manuscript.

Q2: Line 19: What is the full name of HHU24SWDSCS?

Response: The authors thank the reviewer for these beneficial comments. The full name of the shallow-water bathymetry model developed in this study is 'Shallow-Water Depth (SWD) Model for the South China Sea (SCS) developed by Hohai University in 2024,' which has been abbreviated as 'HHU24SWDSCS' (Hohai University 2024 Shallow-Water Depth Model of South China Sea). This nomenclature reflects the model's specific application to shallow-water bathymetry in the South China Sea, its development institution, and the year of creation. Based on the comment of the reviewer, the authors have added a detailed explanation of the model name in the revised manuscript. Please refer to lines 19-20 and lines 95-96 for more information.

Q3: Line 31: How to define the shallow water in the study?

Response: The authors thank the reviewer for these beneficial comments. This study focuses on Satellite-Derived Bathymetry (SDB) modeling in shallow waters around the South China Sea (SCS) islands, primarily based on two considerations: (1) these areas are challenging for shipborne or airborne bathymetric surveys due to political and cost constraints, and (2) the relatively better water quality surrounding these islands, which provides favorable conditions for high-precision bathymetry modeling. However, the prior water depth information is constrained by the penetration capability of ICESAT-2 and the reflectance attenuation characteristics of Sentinel-2. In the clear waters of the South China Sea, ICESAT-2 can achieve bathymetric measurements up to ~30 m. Furthermore, existing research indicates that the mapping function between ICESAT-2 depth information and Sentinel-2 reflectance maintains a favorable linear relationship within the 30-40 m depth range, which significantly enhances the accuracy of SDB. Therefore, the study defines the shallow water zone as the intersection of effective detection depths from both datasets, subsequently

limiting the study area to nearshore waters within 30-40 m depth. Based on the comment of the reviewer, the authors have supplemented and refined the detailed description of the shallow water zone definition in the revised manuscript. Please refer to lines 124-126 for more information.

Regarding the determination of the shallow water mask for the islands and reefs, the shallow water mask in this study is based on the intersection of NDWI and ICESat-2 data. The authors initially used Sentinel-2-derived NDWI for preliminary selection. However, there are two primary limitations when using NDWI alone to construct the shallow water mask. First, the relatively low spatial resolution of Sentinel-2 results in imprecise mask boundaries. More importantly, NDWI differentiates water bodies and land based on the reflectance differences between spectral bands. However, since this study mainly focuses on shallow water areas (with minimum depths < 10 m), the bottom variation significantly affect light scattering and absorption. This causes NDWI to perform poorly in shallow waters, leading to misclassification issues. Thanks to its high resolution and ability to capture both water surface and bottom signals, ICESat-2 data compensates for the limitations of NDWI, enabling the identification of shallow water areas in regions where NDWI is less effective or in more complex environments. Based on the comment of the reviewer, the authors have added a detailed explanation of the shallow water mask extraction. Please refer to lines 189-196 for more information.

Q4: Line 105: It is seen that the authors only retrieved water depths over island areas, is it possible to perform SDB modeling in nearshore areas (e.g., estuarine region), and what is the SDB quality there?

Response: The authors thank the reviewer for these beneficial comments. Indeed, while SDB technology demonstrates feasibility for bathymetric mapping in nearshore areas (e.g., estuarine region), it presents significant technical challenges. The accuracy of SDB modeling in estuarine region is constrained by multiple factors, including the penetration depth limitations of ICESAT-2, reflectance attenuation characteristics of Sentinel-2, and water quality parameters such as chlorophyll concentration, bottom type, and turbidity. These constraints inevitably lead to reduced data quality and availability. In addition, previous studies, such as Xu et al. (2022), have successfully implemented SDB modeling in inter-tidal areas, demonstrating its potential for investigating sediment dynamics. However, this study has excluded these regions from its scope considering the complex influences of nearshore water quality and seafloor variations on SDB modeling accuracy. Based on the comment of the reviewer, the authors have expanded the research outlook in the conclusion section, highlighting the potential for future in-depth investigations into SDB applications in estuarine environments. Please refer to lines 594-596 for more information.

Q5: Table 1: More information should be further shown, like max depth, min depth, mean depth, etc.

Table 1 and Table 2: These tables should follow the three-line table format.

Response: The authors thank the reviewer for these beneficial comments. Based on the comment of the reviewer, the table formatting issues have been corrected in the revised manuscript. Additionally, the SDB depth ranges for each region have been described in the context of Figure 8. Please refer

to lines 402-411 for more information.

Q6: Line 145: The explanation regarding the selection of training and validation data is not sufficiently clear. Why was an 8:2 rule used for training and validation? How about the data distribution?

Response: The authors thank the reviewer for these beneficial comments. The authors realize that the criteria for selecting training and validation data, as well as their distribution, were not clearly explained. In this study, the entire tracks of ICESat-2 data were manually selected for use as training or validation data, with each track being used for only one purpose. This approach not only ensures the independence and uniform spatial distribution of the training and validation data but also allows for better data control and good spatial coverage of the validation data. Moreover, numerous studies have used this method to independently validate SDB modeling results (e.g., Ma et al, 2020; Wu et al., 2023). Although airborne laser or shipborne sonar bathymetric data can provide a better and more independent validation of SDB results, the authors also noted in the introduction that bathymetric data from airborne or shipborne measurements tend to be sparsely distributed due to the high costs and limited coverage of these techniques. Given that the SDB results presented in this study cover over 120 islands and reefs in the South China Sea, spanning more than 1000 km<sup>2</sup>, it is not feasible to conduct a global validation using airborne or shipborne data. On the other hand, the spatial distribution of ICESat-2 tracks makes it more convenient for performing global model validation.

Furthermore, since the authors conducted individual SDB modeling for each island or reef, a detailed selection of training and validation data for each island was performed, resulting in a final data split of approximately 80% for training and 20% for validation. For example, for Huaguang Reef, a total of 96 valid ICESat water depth tracks were obtained, of which 72 tracks were used for training and the remaining 24 for validation, with their distribution illustrated in Fig. 1 below. Based on the reviewer's comments, the authors have added more explanations regarding the selection of training and validation data in the revised manuscript, please refer to page 5 line 147-150.

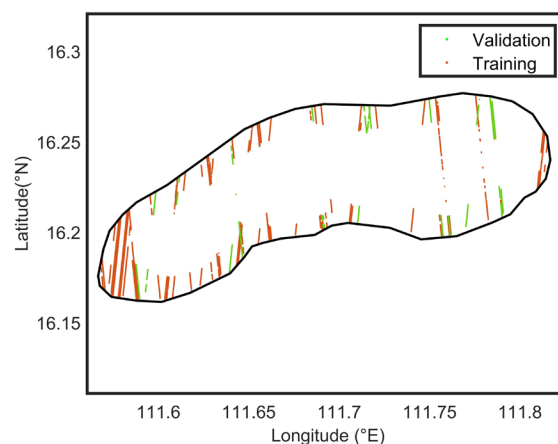

Fig. 1 Training and validation data distribution in Huaguang Reef

Q7: Figure 3: How did the authors perform water mask in the imagery? Since the study focuses on

shallow water areas, it is easy to cause confusion between land and water in Sentinel-2 imagery.

Response: The authors thank the reviewer for these beneficial comments. Regarding the determination of the shallow water mask for the islands and reefs, the shallow water mask in this study is based on the intersection of NDWI and ICESat-2 data. The authors initially used Sentinel-2-derived NDWI for preliminary selection. However, there are two primary limitations to using NDWI alone to construct the shallow water mask. First, the relatively low spatial resolution of Sentinel-2 results in imprecise mask boundaries. More importantly, NDWI differentiates water bodies and land based on the reflectance differences between spectral bands. However, since this study mainly focuses on shallow water areas (with minimum depths < 10 m), the bottom significantly affect light scattering and absorption. This causes NDWI to perform poorly in shallow waters, leading to misclassification issues. Thanks to its high resolution and ability to capture both water surface and bottom signals, ICESat-2 data compensates for the limitations of NDWI, enabling the identification of shallow water areas in regions where NDWI is less effective or in more complex environments. Based on the comment of the reviewer, the authors have added a detailed explanation of the shallow water mask extraction. Please refer to lines 189-196 for more information.

Q8: Section 3.1: What is the bounding depth detected by IceSat-2? What factors can affect the ability of IceSat-2-based depth detection?

Response: The authors thank the reviewer for these beneficial comments. In the study area (i.e., SCS), the water clarity enables ICESat-2 to effectively penetrate water depths of approximately 30 m. Its 532 nm laser wavelength demonstrates good penetration capability in clear waters; however, the laser signal undergoes attenuation due to the optical properties of water during propagation, leading to measurement failure in deeper regions beyond 30 m.

More importantly, several environmental factors, such as water clarity, wave conditions, suspended matter concentration, and seabed reflectivity characteristics, also limit the detection depth range. Seabed characteristics play a crucial role in measurement accuracy. The flat sandy or rocky seabed can produce strong return signals, thereby enhancing measurement precision, while soft sediments (e.g., muddy bottoms) or complex topographies tend to cause laser signal scattering or absorption, resulting in weaker return signals and reduced measurement accuracy. Based on the comment of the reviewer, more explanation about the bounding depth of ICESAT-2 is added in the revised manuscript, please refer to lines 145-146 for more information.

Q9: Section 3.2: What is the bounding depth detected by Sentinel-2? The description of the methodology may be improved. For instance, the choice of modeling region and the reasons for data segmentation and Pearson correlation analysis are not adequately explained.

Response: The authors thank the reviewer for these beneficial comments. This study primarily utilizes the red, green, and blue (RGB) bands of Sentinel-2 multispectral imagery for SDB modeling. The detection depth range of these bands is influenced by factors such as water transparency, band-specific attenuation characteristics, and seabed reflectance properties. Firstly, water transparency is a critical factor determining the depth-detection capability of the RGB bands. In clear water, light

signals can penetrate deeper layers. However, in turbid waters, suspended particles (e.g., sediments, plankton) significantly increase light scattering and absorption, leading to rapid signal attenuation and limiting detection depth. Secondly, the attenuation rates of different bands vary. The red band attenuates the fastest and has the weakest penetration capability, while the blue and green bands exhibit stronger underwater detection capabilities. Additionally, the reflectance properties of the seabed significantly affect detection accuracy. Hard seafloor (e.g., sandy or rocky bottoms) reflect stronger signals than the soft sedimentary bottoms or complex seabed terrains. Based on the SDB modeling results for the SCS presented in this study, Sentinel-2 can achieve reasonable seabed topography delineation within a depth range of 30-40 m. This indicates that its effective detection depth in clear waters can reach up to 30-40 m.

In this study, the shallow water areas surrounding the islands and reefs were chosen as the SDB modeling regions, as shown in Figs. 1 and 8 in the original manuscript. Due to limitations in image quality and water quality conditions, the authors restricted each SDB modeling region to either a single island or a group of nearby reefs. For example, in Fig. 3(a) and Table 2 of the original manuscript, typical island regions in the Xisha and Nansha areas are presented, along with the images and ICESat-2 data used for SDB modeling in each region. Taking the Yongle Atoll as an example (Fig. 2 below), it includes several small islands such as Ganquan Island and Jinyin Island. Due to the relatively concentrated spatial distribution of these islands, the authors assumed that the Sentinel-2 image quality, lighting conditions, and other factors would be similar across these regions. As such, a unified regression model was applied to the entire group of islands in the region.

The authors realize that the explanation for the Pearson analysis may not be sufficiently clear and could potentially cause confusion for readers. In fact, the authors' intention here is to segment the ICESat-2 depth point cloud data into specific intervals and then perform Pearson correlation analysis with the corresponding RGB reflectance information from Sentinel-2. This analysis helps to identify and remove outlier or noisy data, thereby improving the robustness and noise resistance of the SDB model. Due to the influences of water quality, bottom conditions, and other factors on ICESat-2 point cloud data, as well as the effects of lighting and atmospheric conditions on Sentinel-2, significant anomalies may arise between the along-track water depth data from ICESat-2 and the corresponding reflectance data from Sentinel-2 pixels. Such anomalies can adversely affect the regression parameter estimation based on the linear band model (LBM) model. Consequently, the authors segmented the ICESat-2 depth data and correlated it with Sentinel-2 reflectance data to filter out low-quality data points. A correlation threshold of  $p = 0.4$  was chosen. When the correlation coefficients for two or more bands were below this threshold, the data was considered of low quality and excluded from the SDB modeling. Based on the comments of reviewer 1, the authors have revised the description to specify that the correlation analysis was conducted with a step size of 500 m. Based on the comment of the reviewer, more explanation about the method and choice of modeling region is added in the revised manuscript, please refer to lines 173-178, lines 189-196, and lines 364-367 for more information.

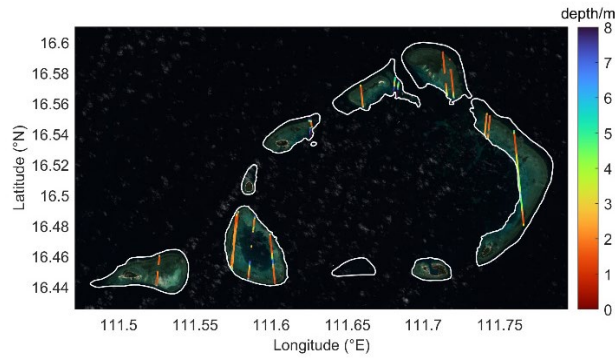

Fig. 2 the Sentinel-2 imagery (background), ICESat-2 water depth (tracks), shallow water mask (white polygons) of the Yongle island region

Q10: Line 310: How generalizable is the LBM model trained by the authors? Can it be applied to other marine areas with insufficient ICESat-2 data for SDB modeling?

Response: The authors thank the reviewer for these beneficial comments. Indeed, the accuracy of SDB modeling based on ICESat-2 data and Sentinel-2 imagery is significantly influenced by factors such as water quality, seabed characteristics, and solar illumination in shallow waters. This is the primary reason why the SDB modeling regions have been restricted to individual islands and their adjacent areas in this study. Similarly, the generalization performance of the LBM is constrained by several factors, including the representativeness and quantity of the modeling data, as well as the quality of Sentinel-2 imagery. In general, LBM is a regression model, and its generalization performance improves significantly when more representative and higher-quality data are used for training. However, due to the limited parameter number of the LBM and the lack of consideration for environmental factors such as seabed characteristics and turbidity, as well as the absence of physical constraints, the modeling performance of LBM can vary greatly across different regions. To further enhance the model's generalization performance and enable its application in areas with sparse ICESat-2 data, the author suggests improvements in two key aspects: first, selecting a larger and more representative dataset (covering various depths, times, turbidity levels, and seabed types); second, incorporating machine learning or deep learning frameworks with physical constraints in SDB modeling. This would enable a more comprehensive consideration of influencing factors, optimize model parameter training, and ultimately improve the robustness and transferability of SDB modeling. The author sincerely appreciates the reviewer's valuable suggestions, which have provided new directions for future research. Based on the reviewer's comments, the author has added more insights on the generalization capability of the model in the conclusion section and will explore this issue further in subsequent studies. Please refer to lines 589-591 for more information.

Q11: Line 350: How deep of water depths can be detected from SDB (seems ~ 30 m in this study area), is it possible to apply SDB modeling over water areas with deeper depths than the one used in this study?

Response: The authors thank the reviewer for these beneficial comments. The SDB technique is limited by its inability to detect seafloor topography in deep waters, where the SDB over the water

areas with depths deeper than 30 m may become unreliable. This impedes the extensive applications of the SDB technique, and the acquirement of water depths over deep water areas largely relies on in situ data acquired from echo soundings, LiDAR data, and seismic depths. Please refer to L402-411 and lines 556-557 for more information.

Q12: Figure 8: The authors mentioned several islands and reefs in their model but omit other islands and reefs in the South China Sea, such as the ones in the Zhongsha Islands region. Please explain this issue.

Response: The authors thank the reviewer for these beneficial comments. The authors have excluded the Zhongsha Islands from the SDB modeling scope primarily due to the challenges in acquiring high-quality ICESat-2 bathymetric data in this region. The detection capability of ICESat-2 is influenced by multiple factors, including water transparency, suspended sediment concentration, and seabed reflectivity characteristics. Although the Zhongsha Islands area maintains relatively clear waters, the sandy seabed and greater water depth compared to the coral reef regions of the Xisha and Nansha Islands present additional challenges. Furthermore, the geological characteristics of the seabed may cause scattering or absorption of the laser signal during transmission, resulting in weakened return signals and reduced data availability. Within the Zhongsha Islands region, only the Huangyan Island area has yielded relatively reliable ICESat-2 bathymetric data, while data availability remains poor in other areas such as the large atoll regions. As a result, the authors have excluded this region from the current study. Based on the comment of the reviewer, the authors have provided additional explanatory details in the revised manuscript to clarify this issue. Please refer to lines 119-121 for more information.

Q13: Figures 9 and 10: The point cloud density was uneven, with most points concentrated in the 1-3 meter depth range. While Figure 7 shows that the ICESat-2 data was predominantly concentrated in shallow water areas, this could lead to inconsistent fitting of the regression model across different depth ranges. I suggest the authors consider resampling the ICESat-2 data within the 1-3 meter range.

Response: The authors thank the reviewer for these beneficial comments. The authors acknowledge the formatting inconsistencies in the regression analysis results presented in Figures 9 and 10. Based on the comment of the reviewer, the point cloud data from regression analysis have been resampled to achieve a more uniform depth distribution. Also, the statistics of these two figures are updated. Please refer to revised Figure 9 and 10.

Q14: Figure 11: Similar to the previous figures, Figure 11 showed uneven point cloud density distribution. Additionally, the origin of the XY axes should be at 0 m, rather than -10 m. Please redraw these figures.

Response: The authors thank the reviewer for these beneficial comments. The authors have thoroughly revised the modeling dataset by implementing depth-stratified resampling to achieve a uniform data distribution, thereby enhancing the reliability and validity of the regression analysis results. Based on the comment of the reviewer, Figure 11 has been completely redesigned, with



particular attention paid to optimizing the axis scaling and presentation of the regression analysis plots. Please refer to revised Figure 11.

Q15: Line 440: There was no introduction of the DTU18BAT, topo\_27.1, GEBCO\_2023, or SRTM models earlier in the manuscript. What data these models use for construction? What are their spatial resolutions and accuracies? More information can be included.

Response: The authors thank the reviewer for these beneficial comments. In this study, several recently released global bathymetry models are considered, including DTU18BAT, topo\_25.1, SRTM15+V2.5.5, and GEBCO\_2023. DTU18BAT (1'×1') is a latest version of series of models developed by the Technical University of Denmark (DTU) in 2019 ([https://ftp.space.dtu.dk/pub/DTU18/1\\_MIN/](https://ftp.space.dtu.dk/pub/DTU18/1_MIN/)). DTU18BAT was constructed by a combination of the GEBCO model and satellite altimetric gravity anomalies; and this model included 3 years of Sentinel-3A and 7 years of Cryosat-2 data and used FES2014 for ocean tide correction. The topo\_25.1 (1'×1') is a recently released model developed by the Scripps Institution of Oceanography (SIO) ([https://topex.ucsd.edu/pub/global\\_topo\\_1min/](https://topex.ucsd.edu/pub/global_topo_1min/)), and it was predicted from ship soundings and satellite altimetric gravity anomalies. SIO has developed several versions of bathymetry models, and the models have been consistently improved in terms of accuracy and resolution with the accumulation of satellite altimetry data. SRTM15+V2.5.5 (15"×15") is an updated version of SRTM15+ series of models that were developed in SIO ([https://topex.ucsd.edu/pub/srtm15\\_plus/](https://topex.ucsd.edu/pub/srtm15_plus/)). These models were computed by combining shipboard soundings and depths predicted from satellite altimetric gravity data. GEBCO\_2023 was a recently released model developed by the GEBCO Bathymetric Compilation Group in 2023 ([https://www.gebco.net/data\\_and\\_products/gridded\\_bathymetry\\_data/](https://www.gebco.net/data_and_products/gridded_bathymetry_data/)). GEBCO\_2023 was developed by using SRTM15+V2.5.5 as the base data, and included in-situ depths, such as echo soundings, seismic records, and lidar data. GEBCO\_2023 was well constrained where in-situ data were available, whereas interpolation was implemented from satellite altimetry-predicted depths and bathymetric soundings at locations where in-situ records were missing. Based on the comment of the reviewer, the authors have provided additional introduction in the revised manuscript, please refer to lines 220-237 for more information.

Q16: Line 495: The authors have used ICESat-2 data spanning over five years for SDB modeling. Have they considered the potential impact of temporal changes in seafloor topography due to human activities or ocean currents during this period?

Response: The authors thank the reviewer for these beneficial comments. The local bathymetry is affected by the temporal changes caused by sediment deposition, erosion, ocean current, human activities and etc. The human induced influence is neglected, due to fact that the study area is a remote region and the effect of human activities here is relatively weak. However, other temporal factors may have potential influences on underwater topography. According to previous studies, we assume that the temporal changes of underwater topography have minor influences on water depth estimation over short periods in the study area. Moreover, we choose the Sentinel-2 images that fall within the time spans of the ICESat-2 data, which are close to the overpass time of the ICESat-2 data (from 2018 to 2023) used in this study. In such a way, the effects of the temporal changes on



local bathymetry estimation can be largely reduced. Please refer to lines 169-170 for more information.

Q17: Line 520: The conclusion contained some repetitive expressions and redundant language. It can be streamlined for conciseness.

Response: The authors thank the reviewer for these beneficial comments. The conclusion section has been substantially revised to enhance its precision and focus. The authors have carefully reviewed the entire manuscript to correct grammatical errors and improve language clarity. These revisions have significantly improved the overall quality and readability of the manuscript. Please refer to lines 572-596 for more information.

Q18: Line 545: The appendix lists all the islands and reefs used for modeling, but does the author model each of these individually? How much data was used for each island or reef?

Response: The authors thank the reviewer for these beneficial comments. In this study, the shallow water areas surrounding the islands and reefs were chosen as the SDB modeling regions, as shown in Figs. 1 and 8 in the original manuscript. Due to limitations in image quality and water quality conditions, the authors restricted each SDB modeling region to either a single island or a group of nearby reefs. For example, in Fig. 3(a) and Table 2 of the original manuscript, typical island regions in the Xisha and Nansha areas are presented, along with the images and ICESat-2 data used for SDB modeling in each region. Taking the Yongle Atoll as an example (Fig. 3 below), it includes several small islands such as Ganquan Island and Jinyin Island. Due to the relatively concentrated spatial distribution of these islands, the authors assumed that the Sentinel-2 image quality, lighting conditions, and other factors would be similar across these regions. As such, a unified regression model was applied to the entire group of islands in the region. The authors first selected the high-quality Sentinel-2 L2A image (20210817T025549) and extracted the RGB band information within the shallow water mask region. Additionally, as confirmed in the study by Jia et al. (2023), applying deep-water reflectance correction to Sentinel-2 imagery significantly improves the accuracy of SDB modeling. Based on the GBCO empirical model, the authors identified regions with water depths exceeding 100 m in the modeling area. The RGB reflectance of these deep-water regions was extracted and used as correction information to eliminate sun glint and other surface effects in the RGB data.

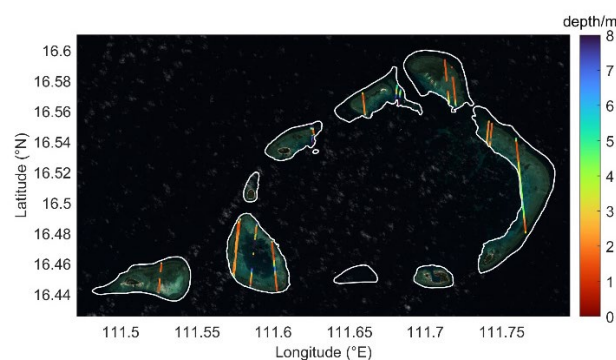

Fig. 3 the Sentinel-2 imagery (background), ICESat-2 water depth (tracks), shallow water mask (white polygons) of the Yongle island region

Next, the authors used 19 ICESat-2 tracks containing sea floor information as prior water depth data, which underwent processing steps including water depth point cloud extraction, noise removal, refraction correction, and reference datum unification. Due to the presence of significant Gaussian noise in the depth point cloud, the authors applied piecewise linear fitting to identify the mid-line of the water depth point cloud, which was then used as the true water depth. The depth range was subsequently gridded, and the fitted water depth values were uniformly sampled within grids of different depths, ensuring an equal distribution of point cloud data across varying depth levels. Additionally, as the ICESat-2 data has a significantly higher along-track resolution (0.7 m) compared to the Sentinel-2 spatial resolution (10 m), the authors computed the average depth for the ICESat points located within each pixel and used this averaged value as the prior water depth for that pixel. This process ensures that the prior depth data is consistent with the spatial resolution of the Sentinel-2 imagery.

Finally, the authors extracted the RGB reflectance information from each Sentinel-2 pixel along the ICESat-2 track and performed multiple linear regression fitting using the LBM model, relating this reflectance data to the ICESat-2 prior water depth. Through this process, the regression parameters were estimated. The trained model was then applied to the Sentinel-2 reflectance data, resulting in the SDB model for the shallow water region of the Yongle island.

It is important to note that the islands and reefs mentioned in line 170 of the original manuscript were selected as typical examples from the Xisha and Nansha regions to facilitate the demonstration of the SDB modeling process and its details. The regression modeling areas for these islands are located within the shallow water mask regions shown in Fig. 3 of the original manuscript (inside the white shapes). For all other islands, the corresponding regression modeling areas can be found in the shallow water regions of Fig. 1 of the original manuscript (inside the gray shapes). Additionally, the content in lines 320-325 focuses on selecting the ICESat-2 water depth data and Sentinel-2 RGB reflectance information with the highest correlation based on Pearson correlation analysis. This step is critical to avoid including outliers or noise that could affect the SDB modeling. Based on the reviewer's comments, the authors have further clarified the issue of regression modeling areas in the revised manuscript and have expanded the explanations related to data selection and the modeling approach, making the manuscript clear and comprehensive, please refer to lines 173-177, line 189-196, Figure 3 and Table 2 for more information.

Q18: The manuscript contains several expressions like "point clouds," where "point" should be replaced with "data".

References: The format of literatures should be further normalized.

Response: The authors thank the reviewer for these beneficial comments. The authors have carefully revised and corrected this expression throughout the entire manuscript. Additionally, the authors have conducted a thorough review of the manuscript to ensure all statements are precise and scientifically accurate. Please refer to the revised manuscript.

## Reference

- Jia, D., Li, Y., He, X., Yang, Z., Wu, Y., Wu, T., and Xu, N.: Methods to improve the accuracy and robustness of satellite-derived bathymetry through processing of optically deep waters, *Remote Sensing*, 15, 5406, <https://doi.org/10.3390/rs15225406>, 2023.
- Ma, Y., Xu, N., Liu, Z., Yang, B., Yang, F., Wang, X. H., and Li, S.: Satellite-derived bathymetry using the ICESat-2 lidar and sentinel-2 imagery datasets, *Remote Sens. Environ.*, 250, 112047, <https://doi.org/10.1016/j.rse.2020.112047>, 2020.
- Xu, N., Ma, Y., Yang, J., Wang, X. H., Wang, Y., and Xu, R.: Deriving Tidal Flat Topography Using ICESat-2 Laser Altimetry and Sentinel-2 Imagery, *Geophys. Res. Lett.*, 49, e2021GL096813, <https://doi.org/10.1029/2021GL096813>, 2022.
- Wu, Y., Li, Y., Jia, D., Andersen, O. B., Abulaitijiang, A., Luo, Z., and He, X.: Seamless seafloor topography determination from shallow to deep waters over island areas using airborne gravimetry, *IEEE Trans. Geosci. Remote Sens.*, 61, 1–19, <https://doi.org/10.1109/TGRS.2023.3336747>, 2023.
